# Supplementary material for: A novel chip-based parallel transfection assay to evaluate paracrine cell interactions
Source: Royal Society of Chemistry journal article supplement (doi:10.1039/c2lc20724a), 2012-01-01
Supplement: c2lc20724a.pdf [file c2lc20724a.pdf]

## Supplementary Figure 1

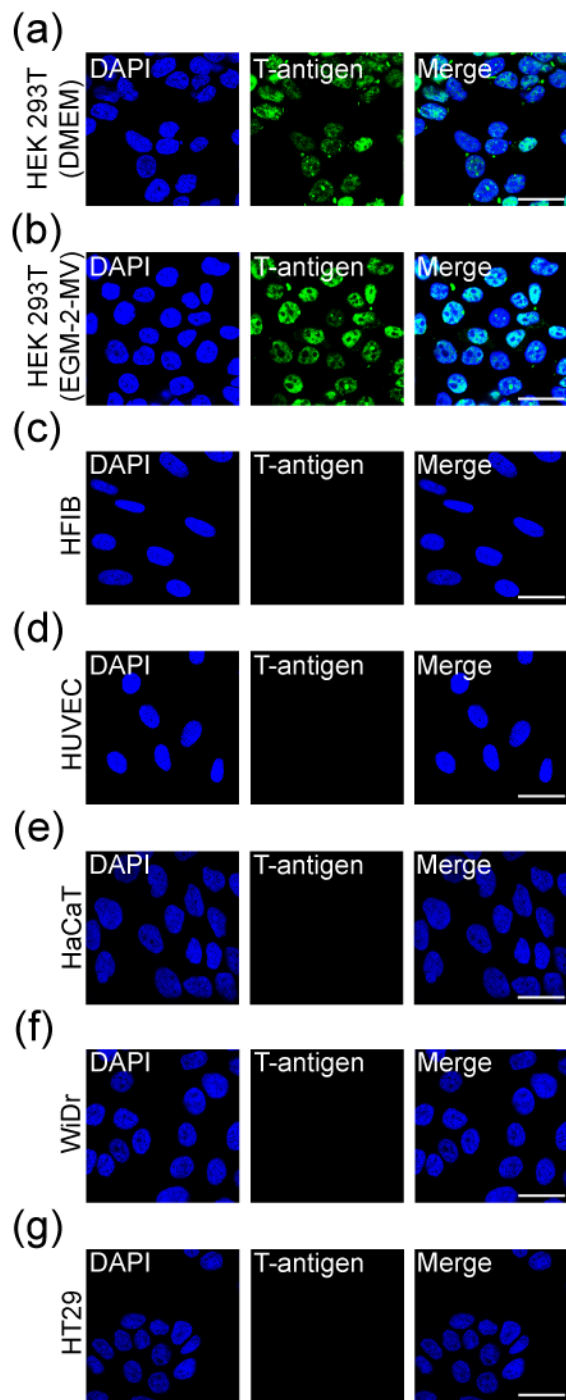

T-antigen expression differentiates HEK 293T cells from the indicator cell types. T-antigen was stained with immunofluorescence (green nuclear staining) in (a, b) HEK 293T cells incubated in medium used for co-cultivation with HFIB, HaCaT, HT29, or WiDr (DMEM) or with endothelial cells (EGM-2-MV), (c) HFIB, (d) HUVEC, (e) HaCaT, (f) WiDr, and (g) HT29. All cells were counterstained with DAPI. Scale bars = 25  $\mu$ m
